# Supplementary material
Source: PubMed Central journal article supplement (PMC2891054)
Supplement: NIHMS188981-supplement-1_si_001.pdf [file NIHMS188981-supplement-1_si_001.pdf]

Supplemental Table 1. Interactions between the tetrasaccharide and the two molecules of PPA with which it interacts..

| Glucose<br>and atom                                  | distance<br>(Å) | contacting<br>atom | distance<br>(Å)          | contacting<br>atom |      |        |     |
|------------------------------------------------------|-----------------|--------------------|--------------------------|--------------------|------|--------|-----|
| Possible direct hydrogen bonding interactions <3.5 Å |                 |                    |                          |                    |      |        |     |
| 602                                                  | O3              | 3.08               | Thr52                    | O                  |      |        |     |
| 602                                                  | O2              | 2.87               | Lys261 (2 <sub>1</sub> ) | NZ                 |      |        |     |
| 603                                                  | O3              | 2.98               | Thr52                    | OG1                |      |        |     |
| 603                                                  | O2              | 2.78               | Glu272 (2 <sub>1</sub> ) | OE2                |      |        |     |
| 603                                                  | O6              | 3.02               | Asn279 (2 <sub>1</sub> ) | ND2                |      |        |     |
| Water-mediated interactions (distances < 3.5 Å)      |                 |                    |                          |                    |      |        |     |
| 601                                                  | O3              | 2.94               | wat439                   | O                  | 2.82 | Asn53  | OD1 |
| 601                                                  | O2              | 2.56               | wat440                   | O                  | 2.85 | Ser55  | N   |
| 601                                                  | O2              | 2.56               | wat440                   | O                  | 3.19 | Ser55  | OG  |
| 602                                                  | O3              | 3.35               | wat440                   | O                  | 2.85 | Ser55  | N   |
| 602                                                  | O3              | 3.35               | wat440                   | O                  | 3.19 | Ser55  | OG  |
| 604                                                  | O1              | 2.74               | wat570                   | O                  | 2.56 | Gly106 | O   |
| Other contacts < 4Å                                  |                 |                    |                          |                    |      |        |     |
| 601                                                  | C1              | 3.63               | Asn53                    | OD1                |      |        |     |
| 601                                                  | O2              | 2.97               | Pro54                    | CB                 |      |        |     |
| 601                                                  | O2              | 3.95               | Trp357                   | CZ2                |      |        |     |
| 601                                                  | O6              | 3.82               | Gly285 (2 <sub>1</sub> ) | CA                 |      |        |     |
| 602                                                  | C3              | 3.77               | Thr52                    | O                  |      |        |     |
| 602                                                  | C4              | 3.04               | Asn53                    | OD1                |      |        |     |
| 602                                                  | O4              | 3.41               | Asn53                    | CG                 |      |        |     |
| 602                                                  | C2              | 3.99               | Lys261 (2 <sub>1</sub> ) | NZ                 |      |        |     |
| 602                                                  | C6              | 3.99               | Gly283 (2 <sub>1</sub> ) | O                  |      |        |     |
| 602                                                  | C2              | 3.51               | Trp284 (2 <sub>1</sub> ) | O                  |      |        |     |
| 602                                                  | C6              | 3.60               | Gly285 (2 <sub>1</sub> ) | N                  |      |        |     |
| 602                                                  | C2              | 3.80               | Lys261 (2 <sub>1</sub> ) | CE                 |      |        |     |
| 602                                                  | O2              | 3.10               | Lys261 (2 <sub>1</sub> ) | CE                 |      |        |     |
| 602                                                  | O5              | 3.21               | Trp284 (2 <sub>1</sub> ) | C                  |      |        |     |
| 603                                                  | C3              | 3.61               | Thr52                    | OG1                |      |        |     |
| 603                                                  | O3              | 3.64               | Thr52                    | CB                 |      |        |     |
| 603                                                  | O4              | 3.68               | Asn53                    | CB                 |      |        |     |
| 603                                                  | C2              | 3.41               | Glu272 (2 <sub>1</sub> ) | OE2                |      |        |     |
| 603                                                  | C1              | 3.81               | Tyr276 (2 <sub>1</sub> ) | CD2                |      |        |     |
| 603                                                  | C6              | 3.73               | Trp284 (2 <sub>1</sub> ) | NE1                |      |        |     |
| 603                                                  | C2              | 3.32               | Glu272 (2 <sub>1</sub> ) | OE1                |      |        |     |
| 603                                                  | C6              | 3.89               | Asn279 (2 <sub>1</sub> ) | ND2                |      |        |     |
| 603                                                  | O2              | 3.28               | Glu272 (2 <sub>1</sub> ) | CD                 |      |        |     |
| 603                                                  | O2              | 3.81               | Tyr276 (2 <sub>1</sub> ) | CD2                |      |        |     |
| 603                                                  | O6              | 3.73               | Asn279 (2 <sub>1</sub> ) | CG                 |      |        |     |
| 603                                                  | C6              | 3.89               | Trp284 (2 <sub>1</sub> ) | CD1                |      |        |     |
| 603                                                  | O2              | 3.33               | Glu272 (2 <sub>1</sub> ) | CD                 |      |        |     |
| 603                                                  | O6              | 3.70               | Asn279 (2 <sub>1</sub> ) | CG                 |      |        |     |
| 604                                                  | O4              | 3.93               | Ala108                   | CB                 |      |        |     |

Supplementary Table 2. Interactions between 2<sub>1</sub>-screw related PPA molecules across the bridged interface.

| Residue<br>and atom                                  |     | distance<br>(Å) | contacting<br>atom |     | distance<br>(Å) | contacting<br>atom |
|------------------------------------------------------|-----|-----------------|--------------------|-----|-----------------|--------------------|
| Possible direct hydrogen bonding interactions <3.5 Å |     |                 |                    |     |                 |                    |
| Thr52                                                | O   | 3.21            | Lys261             | NZ  |                 |                    |
| Thr52                                                | OG1 | 3.22            | Glu272             | OE2 |                 |                    |
| Trp344                                               | O   | 3.19            | Asn152             | ND2 |                 |                    |
| Ala345                                               | N   | 3.15            | Asn152             | ND2 |                 |                    |
| Asn364                                               | ND2 | 3.22            | Gly306             | O   |                 |                    |
| Asn364                                               | OD1 | 2.72            | Gly308             | N   |                 |                    |
| Asn364                                               | ND2 | 3.49            | Gly309             | N   |                 |                    |
| Asp381                                               | OD1 | 2.73            | Ser150             | OG  |                 |                    |
| Asp381                                               | OD2 | 3.19            | Asn152             | ND2 |                 |                    |
| Water-mediated interactions (distances < 3.5 Å)      |     |                 |                    |     |                 |                    |
| Ala345                                               | N   | 2.96            | wat79              | O   | 2.94            | Gly239 O           |
| Ala345                                               | N   | 2.96            | wat79              | O   | 3.09            | Asn152 OD1         |
| Asn380                                               | N   | 2.95            | wat213             | O   | 2.72            | Glu149 O           |
| Asp381                                               | OD2 | 2.89            | wat262             | O   | 2.99            | Tyr151 N           |
| Ala109                                               | O   | 3.01            | wat362             | O   | 3.03            | Gly271 O           |
| Asn355                                               | ND2 | 3.08            | wat464             | O   | 2.63            | Glu240 O           |
| Ser55                                                | OG  | 3.10            | wat542             | O   | 2.85            | Leu237 O           |
| Ser55                                                | OG  | 3.10            | wat542             | O   | 2.58            | Lys261 NZ          |
| Thr52                                                | O   | 3.01            | wat547             | O   | 3.08            | Lys261 NZ          |
| ASp381                                               | N   | 3.07            | wat303             | O   | 2.92            | Glu149 O           |
| Asn364                                               | O   | 3.37            | wat387             | O   | 3.00            | Gly308 O           |
| Asn364                                               | O   | 3.37            | wat387             | O   | 3.34            | Ser311 OG          |
| Thr52                                                | O   | 3.38            | wat574             | O   | 2.57            | Lys261 NZ          |
| Ser55                                                | OG  | 2.80            | wat574             | O   | 2.75            | Lys261 NZ          |
| Other contacts < 4Å                                  |     |                 |                    |     |                 |                    |
| Thr52                                                | CG2 | 3.92            | Ser270             | O   |                 |                    |
| Thr52                                                | CB  | 3.54            | Glu272             | OE2 |                 |                    |
| Ala108                                               | CB  | 3.82            | Tyr276             | OH  |                 |                    |
| Gly112                                               | CA  | 3.85            | Ser270             | C   |                 |                    |
| Gly112                                               | CA  | 3.85            | Gly271             | CA  |                 |                    |
| Gly112                                               | CA  | 3.65            | Gly271             | N   |                 |                    |
| Trp316                                               | CH2 | 3.80            | Asn152             | OD1 |                 |                    |
| Arg343                                               | CG  | 3.82            | Asn152             | CG  |                 |                    |
| Arg343                                               | CG  | 3.25            | Asn152             | OD1 |                 |                    |
| Arg343                                               | C   | 3.88            | Asn152             | ND2 |                 |                    |
| Trp344                                               | O   | 3.81            | Asn152             | CG  |                 |                    |
| Trp344                                               | C   | 3.17            | Asn152             | ND2 |                 |                    |
| Trp344                                               | CA  | 3.89            | Asn152             | ND2 |                 |                    |
| Ala345                                               | CB  | 3.78            | Ala241             | CA  |                 |                    |
| Ala345                                               | CB  | 3.66            | Ala241             | N   |                 |                    |
| Ala345                                               | CA  | 3.28            | Asn152             | ND2 |                 |                    |
| Ala345                                               | CA  | 3.90            | Asn152             | OD1 |                 |                    |
| Ala345                                               | CB  | 3.59            | Glu240             | C   |                 |                    |
| Ala345                                               | CB  | 3.54            | Glu240             | O   |                 |                    |
| Ile358                                               | CD1 | 3.53            | Gly239             | CA  |                 |                    |
| Asn364                                               | OD1 | 3.83            | Leu237             | CD1 |                 |                    |
| Asn364                                               | OD1 | 3.80            | Ala307             | C   |                 |                    |
| Asn364                                               | OD1 | 3.28            | Gly308             | CA  |                 |                    |
| Asn364                                               | ND2 | 3.61            | Gly309             | CA  |                 |                    |
| Asn364                                               | CG  | 3.81            | Gly306             | O   |                 |                    |
| Asn364                                               | CG  | 3.60            | Gly308             | N   |                 |                    |
| Asn364                                               | CG  | 3.45            | Gly309             | N   |                 |                    |
| Asp381                                               | OD1 | 3.21            | Ser150             | CB  |                 |                    |
| Asp381                                               | OD2 | 3.94            | Asn152             | CG  |                 |                    |
| Asp381                                               | CG  | 3.53            | Ser150             | OG  |                 |                    |
| Asp381                                               | CG  | 3.82            | Asn152             | ND2 |                 |                    |

Supplementary Table 3. Glucose puckering parameters  $q_2$ ,  $q_3$ ,  $\varphi_2$  after Cremer and Pople<sup>a</sup> with spherical polar equivalents  $Q$ ,  $\theta$ , and  $\varphi_2$  for all glucose residues. Also listed are the average  $B$  and the occupancy of each glucose.

| Residue                    | $\langle B \rangle$ | Occ. | $q_2$ | $q_3$ | $\varphi_2$ | $Q$  | $\theta$ | conformation                          |
|----------------------------|---------------------|------|-------|-------|-------------|------|----------|---------------------------------------|
| tetrasaccharide            |                     |      |       |       |             |      |          |                                       |
| 601                        | 98                  | 0.50 | 0.67  | 0.08  | 146.00      | 0.67 | 166.39   | <sup>4</sup> C <sub>1</sub> (twisted) |
| 602                        | 56                  | 0.80 | 0.08  | 0.54  | 174.74      | 0.55 | 16.85    | <sup>4</sup> C <sub>1</sub>           |
| 603                        | 42                  | 0.80 | 0.05  | 0.51  | 73.72       | 0.51 | 11.20    | <sup>4</sup> C <sub>1</sub>           |
| 604                        | 64                  | 0.70 | 0.05  | 0.47  | 249.34      | 0.47 | 12.15    | <sup>4</sup> C <sub>1</sub>           |
| limit dextrin              |                     |      |       |       |             |      |          |                                       |
| 701                        | 13                  | 0.60 | 0.52  | 0.36  | 150.25      | 0.63 | 110.61   | <sup>4</sup> C <sub>1</sub>           |
| 702                        | 70                  | 0.60 | 0.17  | 0.62  | 123.90      | 0.64 | 30.67    | <sup>4</sup> C <sub>1</sub>           |
| 703                        | 53                  | 0.80 | 0.41  | 0.43  | 165.88      | 0.59 | 87.27    | E <sub>3</sub>                        |
| 704                        | 40                  | 0.90 | 0.06  | 0.57  | 337.60      | 0.57 | 12.02    | <sup>4</sup> C <sub>1</sub>           |
| 705                        | 47                  | 0.90 | 0.13  | 0.48  | 280.50      | 0.50 | 30.31    | <sup>4</sup> C <sub>1</sub>           |
| 706                        | 64                  | 0.60 | 0.30  | 0.48  | 242.36      | 0.57 | 64.01    | <sup>4</sup> E                        |
| glucose on Trp203          |                     |      |       |       |             |      |          |                                       |
| 801                        | 31                  | 0.50 | 0.09  | 0.58  | 22.84       | 0.59 | 17.64    | <sup>4</sup> C <sub>1</sub>           |
| $\alpha$ -cyclodextrin I   |                     |      |       |       |             |      |          |                                       |
| 601                        | 20                  | 1.00 | 0.08  | 0.53  | 50.48       | 0.54 | 17.17    | <sup>4</sup> C <sub>1</sub>           |
| 602                        | 27                  | 1.00 | 0.16  | 0.51  | 93.09       | 0.53 | 34.84    | <sup>4</sup> C <sub>1</sub>           |
| 603                        | 36                  | 1.00 | 0.11  | 0.57  | 54.47       | 0.58 | 21.85    | <sup>4</sup> C <sub>1</sub>           |
| 604                        | 34                  | 1.00 | 0.07  | 0.58  | 345.98      | 0.58 | 13.76    | <sup>4</sup> C <sub>1</sub>           |
| 605                        | 30                  | 1.00 | 0.06  | 0.61  | 11.16       | 0.61 | 11.24    | <sup>4</sup> C <sub>1</sub>           |
| 606                        | 23                  | 1.00 | 0.08  | 0.57  | 28.62       | 0.58 | 15.98    | <sup>4</sup> C <sub>1</sub>           |
| $\alpha$ -cyclodextrin II  |                     |      |       |       |             |      |          |                                       |
| 701                        | 88                  | 1.00 | 0.04  | 0.52  | 92.94       | 0.52 | 8.80     | <sup>4</sup> C <sub>1</sub>           |
| 702                        | 94                  | 1.00 | 0.27  | 0.46  | 60.79       | 0.53 | 60.82    | <sup>4</sup> C <sub>1</sub>           |
| 703                        | 102                 | 1.00 | 0.13  | 0.54  | 72.47       | 0.56 | 27.07    | <sup>4</sup> C <sub>1</sub>           |
| 704                        | 101                 | 1.00 | 0.14  | 0.56  | 25.42       | 0.58 | 28.07    | <sup>4</sup> C <sub>1</sub>           |
| 705                        | 106                 | 1.00 | 0.18  | 0.48  | 78.78       | 0.51 | 41.11    | <sup>4</sup> C <sub>1</sub>           |
| 706                        | 101                 | 1.00 | 0.23  | 0.49  | 75.74       | 0.54 | 50.29    | <sup>4</sup> C <sub>1</sub>           |
| $\alpha$ -cyclodextrin III |                     |      |       |       |             |      |          |                                       |
| 801                        | 118                 | 1.00 | 0.19  | 0.48  | 33.64       | 0.52 | 43.19    | <sup>4</sup> C <sub>1</sub>           |
| 802                        | 113                 | 1.00 | 0.16  | 0.50  | 47.06       | 0.52 | 35.49    | <sup>4</sup> C <sub>1</sub>           |
| 803                        | 120                 | 1.00 | 0.73  | 0.03  | 134.21      | 0.73 | 175.30   | <sup>2,5</sup> B                      |
| 804                        | 113                 | 1.00 | 0.16  | 0.54  | 66.90       | 0.56 | 33.01    | <sup>4</sup> C <sub>1</sub>           |
| 805                        | 105                 | 1.00 | 0.15  | 0.52  | 79.50       | 0.54 | 32.18    | <sup>4</sup> C <sub>1</sub>           |
| 806                        | 114                 | 1.00 | 0.19  | 0.48  | 62.35       | 0.52 | 43.19    | <sup>4</sup> C <sub>1</sub>           |

Supplementary Table 4. Glycosidic linkage torsion angles  $\varphi$  and  $\psi$ , inter-oxygen distances between linkages, O2'...O3 inter-residue distances, and ring twist torsion angles.

| Residues                   | $\angle\text{O5}'\text{-C1}'\text{-C4-O4}$<br>$\varphi$ (°) | $\angle\text{C5-C4-O4-C1}'$<br>$\psi$ (°) | $d(\text{O4}'\text{...O4})$<br>(Å) | $d(\text{O2}'\text{...O3})$<br>(Å) | $\angle\text{O1-C1}'\text{-C4-O4}$<br>ring twist (°) |
|----------------------------|-------------------------------------------------------------|-------------------------------------------|------------------------------------|------------------------------------|------------------------------------------------------|
| tetrasaccharide            |                                                             |                                           |                                    |                                    |                                                      |
| 601                        |                                                             |                                           | 4.68                               |                                    | -18.7                                                |
| 601 - 602                  | 69.2                                                        | -111.2                                    | 4.88                               | 4.18                               | -10.9                                                |
| 602 - 603                  | 126.2                                                       | -109.6                                    | 4.53                               | 2.82                               | -4.4                                                 |
| 603 - 604                  | 127.6                                                       | -113.9                                    | 4.78                               | 2.51                               | -0.1                                                 |
| limit dextrin              |                                                             |                                           |                                    |                                    |                                                      |
| 701                        |                                                             |                                           | 4.56                               |                                    | -10.2                                                |
| 701 - 702                  | 77.9                                                        | -136.6                                    | 4.20                               | 3.55                               | -8.4                                                 |
| 702 - 703                  | 104.8                                                       | -127.4                                    | 4.72                               | 2.73                               | -16.2                                                |
| 703 - 704                  | 115.8                                                       | -100.4                                    | 4.44                               | 2.88                               | 0.9                                                  |
| 704 - 705                  | 122.2                                                       | -123.6                                    | 5.46                               | 2.51                               | 3.8                                                  |
| $\alpha$ -cyclodextrin I   |                                                             |                                           |                                    |                                    |                                                      |
| 601 - 602                  | 117.9                                                       | -114.4                                    | 4.13                               | 2.64                               | 0.8                                                  |
| 602 - 603                  | 108.5                                                       | -118.9                                    | 4.15                               | 3.09                               | -4.5                                                 |
| 603 - 604                  | 101.8                                                       | -107.5                                    | 4.22                               | 3.22                               | -0.4                                                 |
| 604 - 605                  | 105.2                                                       | -120.5                                    | 4.30                               | 2.91                               | 7.1                                                  |
| 605 - 606                  | 107.5                                                       | -111.4                                    | 4.15                               | 2.96                               | 0.3                                                  |
| 606 - 601                  | 105.7                                                       | -102.1                                    | 4.27                               | 3.17                               | 0.9                                                  |
| $\alpha$ -cyclodextrin II  |                                                             |                                           |                                    |                                    |                                                      |
| 701 - 702                  | 131.9                                                       | -132.8                                    | 4.52                               | 2.27                               | -6.9                                                 |
| 702 - 703                  | 104.4                                                       | -117.2                                    | 3.83                               | 3.22                               | -3.3                                                 |
| 703 - 704                  | 145.2                                                       | -131.5                                    | 4.27                               | 2.08                               | -4.4                                                 |
| 704 - 705                  | 107.1                                                       | -107.1                                    | 4.22                               | 3.25                               | -0.5                                                 |
| 705 - 706                  | 137.8                                                       | -115.8                                    | 4.21                               | 2.39                               | -1.4                                                 |
| 706 - 701                  | 139.5                                                       | -127.9                                    | 4.06                               | 2.23                               | -5.3                                                 |
| $\alpha$ -cyclodextrin III |                                                             |                                           |                                    |                                    |                                                      |
| 801 - 802                  | 157.2                                                       | -104.2                                    | 4.15                               | 2.59                               | 1.8                                                  |
| 802 - 803                  | 134.3                                                       | -138.6                                    | 4.17                               | 2.48                               | 1.1                                                  |
| 803 - 804                  | 116.5                                                       | -108.5                                    | 4.28                               | 2.82                               | -34.0                                                |
| 804 - 805                  | 136.2                                                       | -128.9                                    | 4.04                               | 2.33                               | -5.3                                                 |
| 805 - 806                  | 109.8                                                       | -80.6                                     | 4.15                               | 3.92                               | -7.8                                                 |
| 806 - 801                  | 123.1                                                       | -151.6                                    | 4.12                               | 2.57                               | -0.7                                                 |

Supplementary Table 5. Interactions between the limit dextrin and PPA.

| Glucose<br>and atom                                  | distance<br>(Å) | contacting<br>atom | distance<br>(Å) | contacting<br>atom |      |        |     |
|------------------------------------------------------|-----------------|--------------------|-----------------|--------------------|------|--------|-----|
| Possible direct hydrogen bonding interactions <3.5 Å |                 |                    |                 |                    |      |        |     |
| 703                                                  | O6              | 2.97               | Gln63           | NE2                |      |        |     |
| 704                                                  | O6              | 2.88               | Trp59           | O                  |      |        |     |
| 704                                                  | O6              | 2.84               | Gln63           | NE2                |      |        |     |
| 704                                                  | O2              | 3.30               | Asp300          | OD1                |      |        |     |
| 705                                                  | O6              | 3.47               | His101          | NE2                |      |        |     |
| 705                                                  | O6              | 2.80               | Asp197          | OD2                |      |        |     |
| 705                                                  | O1              | 2.83               | Glu233          | OE2                |      |        |     |
| 705                                                  | O3              | 2.61               | Asp300          | OD2                |      |        |     |
| 706                                                  | O6              | 3.01               | Gly106          | O                  |      |        |     |
| Water-mediated interactions (distances < 3.5 Å)      |                 |                    |                 |                    |      |        |     |
| 701                                                  | O3              | 2.68               | wat34           | O                  | 2.77 | Ser145 | OG  |
| 701                                                  | O4              | 2.75               | wat550          | O                  | 3.35 | Ser105 | OG  |
| 701                                                  | O4              | 2.75               | wat550          | O                  | 2.94 | Gln161 | OE1 |
| 701                                                  | O3              | 2.95               | wat576          | O                  | 2.93 | Ile148 | N   |
| 701                                                  | O3              | 2.95               | wat576          | O                  | 2.69 | Gln161 | O   |
| 704                                                  | O2              | 3.02               | wat428          | O                  | 2.83 | Asp300 | OD1 |
| 704                                                  | O2              | 2.71               | wat584          | O                  | 2.44 | Asp300 | OD2 |
| 705                                                  | O5              | 3.31               | wat402          | O                  | 3.21 | Arg195 | NH2 |
| 705                                                  | O5              | 3.31               | wat402          | O                  | 2.67 | Asp197 | OD1 |
| 705                                                  | O1              | 2.43               | wat552          | O                  | 3.43 | His201 | NE2 |
| 706                                                  | O3              | 3.23               | wat549          | O                  | 2.32 | Asn53  | O   |
| Other contacts < 4Å                                  |                 |                    |                 |                    |      |        |     |
| 701                                                  | C3              | 3.97               | Gly164          | N                  |      |        |     |
| 701                                                  | O3              | 3.15               | Gly147          | CA                 |      |        |     |
| 702                                                  | C5              | 3.83               | Val163          | O                  |      |        |     |
| 702                                                  | O4              | 3.80               | Val163          | C                  |      |        |     |
| 703                                                  | C1              | 3.71               | Trp59           | CE3                |      |        |     |
| 703                                                  | C5              | 3.62               | Val163          | O                  |      |        |     |
| 703                                                  | O6              | 3.85               | Gln63           | CD                 |      |        |     |
| 704                                                  | C2              | 3.59               | Trp58           | CH2                |      |        |     |
| 704                                                  | C4              | 3.73               | Trp59           | CB                 |      |        |     |
| 704                                                  | C6              | 3.61               | Gln63           | NE2                |      |        |     |
| 704                                                  | C6              | 3.78               | Leu165          | CD1                |      |        |     |
| 704                                                  | O2              | 3.55               | Trp58           | CH2                |      |        |     |
| 704                                                  | O6              | 3.43               | Trp59           | CE3                |      |        |     |
| 704                                                  | O5              | 3.68               | Tyr62           | CB                 |      |        |     |
| 704                                                  | O6              | 3.46               | Gln63           | CG                 |      |        |     |
| 704                                                  | O4              | 4.00               | Val163          | CG2                |      |        |     |
| 704                                                  | C6              | 3.78               | Leu165          | CD1                |      |        |     |
| 705                                                  | O3              | 3.19               | Asp300          | CG                 |      |        |     |
| 705                                                  | O3              | 3.74               | Asp300          | CG                 |      |        |     |
| 705                                                  | O2              | 3.59               | Ile235          | CD1                |      |        |     |
| 705                                                  | C6              | 3.97               | Tyr62           | CB                 |      |        |     |
| 705                                                  | C6              | 3.69               | His101          | CE1                |      |        |     |
| 705                                                  | C5              | 3.75               | Leu162          | CD2                |      |        |     |
| 705                                                  | C1              | 3.53               | Glu233          | OE2                |      |        |     |
| 705                                                  | C2              | 3.32               | Asp300          | OD2                |      |        |     |
| 705                                                  | O6              | 3.46               | Tyr62           | CB                 |      |        |     |
| 705                                                  | O6              | 3.32               | His101          | CE1                |      |        |     |
| 705                                                  | O6              | 3.53               | Asp197          | CG                 |      |        |     |
| 705                                                  | O2              | 3.31               | Ala198          | CA                 |      |        |     |
| 705                                                  | O1              | 3.59               | Glu233          | CD                 |      |        |     |
| 706                                                  | C1              | 3.48               | Gln63           | NE2                |      |        |     |
| 706                                                  | C6              | 3.59               | Gly104          | CA                 |      |        |     |
| 706                                                  | C6              | 3.36               | Gly106          | N                  |      |        |     |
| 706                                                  | C6              | 3.41               | Ala107          | N                  |      |        |     |
| 706                                                  | O2              | 3.53               | Trp59           | CH2                |      |        |     |

|     |    |      |        |    |
|-----|----|------|--------|----|
| 706 | O6 | 3.53 | Gly104 | CA |
| 706 | O6 | 3.47 | Gly106 | CA |

Supplementary Table 6. Accessible surface areas of aromatic residues and the percentage of the surface area an isolated residue of the same type.

TRP - Accessible surface area - stand alone enzyme

| Res # | <----- whole residue ----> |           |        | <----- Side chain ----> |           |        |
|-------|----------------------------|-----------|--------|-------------------------|-----------|--------|
|       | Area                       | Free Area | % free | Area                    | Free area | % free |
| 19    | 1.7                        | 355.1     | 0.     | 1.1                     | 267.2     | 0.     |
| 21    | 2.0                        | 355.1     | 1.     | 2.0                     | 267.2     | 1.     |
| 58    | 26.4                       | 355.1     | 7.     | 26.0                    | 267.2     | 10.    |
| 59    | 82.3                       | 355.1     | 23.    | 80.9                    | 267.2     | 30.    |
| 134   | 215.2                      | 355.1     | 61.    | 198.5                   | 267.2     | 74.    |
| 203   | 72.8                       | 355.1     | 20.    | 72.8                    | 267.2     | 27.    |
| 221   | 59.8                       | 355.1     | 17.    | 38.3                    | 267.2     | 14.    |
| 269   | 113.2                      | 355.1     | 32.    | 109.8                   | 267.2     | 41.    |
| 280   | 13.0                       | 355.1     | 4.     | 0.0                     | 267.2     | 0.     |
| 284   | 50.4                       | 355.1     | 14.    | 28.7                    | 267.2     | 11.    |
| 316   | 81.0                       | 355.1     | 23.    | 52.1                    | 267.2     | 19.    |
| 344   | 17.1                       | 355.1     | 5.     | 1.5                     | 267.2     | 1.     |
| 357   | 72.4                       | 355.1     | 20.    | 72.4                    | 267.2     | 27.    |
| 382   | 6.0                        | 355.1     | 2.     | 0.9                     | 267.2     | 0.     |
| 388   | 52.2                       | 355.1     | 15.    | 46.0                    | 267.2     | 17.    |
| 396   | 68.5                       | 355.1     | 19.    | 68.2                    | 267.2     | 26.    |
| 409   | 42.4                       | 355.1     | 12.    | 13.1                    | 267.2     | 5.     |
| 410   | 69.5                       | 355.1     | 20.    | 65.4                    | 267.2     | 24.    |
| 434   | 137.5                      | 355.1     | 39.    | 134.0                   | 267.2     | 50.    |
| 134   | 0.0                        | 355.1     | 0.     | 0.0                     | 267.2     | 0.     |
| 396   | 0.0                        | 355.1     | 0.     | 0.0                     | 267.2     | 0.     |

TYR - Accessible surface area - stand alone enzyme

| Res # | <----- whole residue ----> |           |        | <----- Side chain ----> |           |        |
|-------|----------------------------|-----------|--------|-------------------------|-----------|--------|
|       | Area                       | Free Area | % free | Area                    | Free area | % free |
| 2     | 59.5                       | 323.3     | 18.    | 58.8                    | 238.2     | 25.    |
| 31    | 10.7                       | 323.3     | 3.     | 10.7                    | 238.2     | 4.     |
| 62    | 24.1                       | 323.3     | 7.     | 24.1                    | 238.2     | 10.    |
| 67    | 28.2                       | 323.3     | 9.     | 17.3                    | 238.2     | 7.     |
| 94    | 0.0                        | 323.3     | 0.     | 0.0                     | 238.2     | 0.     |
| 118   | 103.5                      | 323.3     | 32.    | 98.2                    | 238.2     | 41.    |
| 131   | 2.9                        | 323.3     | 1.     | 0.0                     | 238.2     | 0.     |
| 151   | 83.1                       | 323.3     | 26.    | 77.7                    | 238.2     | 33.    |
| 155   | 141.5                      | 323.3     | 44.    | 140.5                   | 238.2     | 59.    |
| 174   | 98.7                       | 323.3     | 31.    | 89.9                    | 238.2     | 38.    |
| 182   | 9.0                        | 323.3     | 3.     | 2.9                     | 238.2     | 1.     |
| 247   | 0.5                        | 323.3     | 0.     | 0.0                     | 238.2     | 0.     |
| 258   | 0.0                        | 323.3     | 0.     | 0.0                     | 238.2     | 0.     |
| 276   | 111.0                      | 323.3     | 34.    | 104.0                   | 238.2     | 44.    |
| 321   | 4.1                        | 323.3     | 1.     | 4.1                     | 238.2     | 2.     |
| 333   | 9.1                        | 323.3     | 3.     | 6.1                     | 238.2     | 3.     |
| 342   | 0.5                        | 323.3     | 0.     | 0.3                     | 238.2     | 0.     |
| 449   | 2.4                        | 323.3     | 1.     | 2.4                     | 238.2     | 1.     |
| 468   | 153.7                      | 323.3     | 48.    | 140.5                   | 238.2     | 59.    |

PHE - Accessible surface area - stand alone enzyme

| Res # | <----- whole residue ----> |           |        | <----- Side chain ----> |           |        |
|-------|----------------------------|-----------|--------|-------------------------|-----------|--------|
|       | Area                       | Free Area | % free | Area                    | Free area | % free |
| 17    | 2.2                        | 311.0     | 1.     | 2.1                     | 229.7     | 1.     |
| 37    | 0.2                        | 311.0     | 0.     | 0.1                     | 229.7     | 0.     |
| 79    | 0.1                        | 311.0     | 0.     | 0.1                     | 229.7     | 0.     |
| 126   | 0.1                        | 311.0     | 0.     | 0.0                     | 229.7     | 0.     |
| 136   | 13.9                       | 311.0     | 4.     | 0.0                     | 229.7     | 0.     |
| 194   | 0.1                        | 311.0     | 0.     | 0.1                     | 229.7     | 0.     |
| 222   | 9.5                        | 311.0     | 3.     | 2.8                     | 229.7     | 1.     |
| 229   | 0.0                        | 311.0     | 0.     | 0.0                     | 229.7     | 0.     |
| 231   | 0.1                        | 311.0     | 0.     | 0.1                     | 229.7     | 0.     |

|     |       |       |     |      |       |     |
|-----|-------|-------|-----|------|-------|-----|
| 248 | 46.9  | 311.0 | 15. | 45.5 | 229.7 | 20. |
| 256 | 7.2   | 311.0 | 2.  | 4.3  | 229.7 | 2.  |
| 286 | 12.7  | 311.0 | 4.  | 0.0  | 229.7 | 0.  |
| 295 | 2.6   | 311.0 | 1.  | 2.5  | 229.7 | 1.  |
| 315 | 7.5   | 311.0 | 2.  | 0.9  | 229.7 | 0.  |
| 327 | 0.0   | 311.0 | 0.  | 0.0  | 229.7 | 0.  |
| 335 | 19.5  | 311.0 | 6.  | 19.0 | 229.7 | 8.  |
| 348 | 121.6 | 311.0 | 39. | 93.5 | 229.7 | 41. |
| 397 | 0.5   | 311.0 | 0.  | 0.5  | 229.7 | 0.  |
| 406 | 69.1  | 311.0 | 22. | 50.3 | 229.7 | 22. |
| 419 | 0.4   | 311.0 | 0.  | 0.3  | 229.7 | 0.  |
| 426 | 0.8   | 311.0 | 0.  | 0.4  | 229.7 | 0.  |
| 429 | 0.7   | 311.0 | 0.  | 0.7  | 229.7 | 0.  |
| 477 | 2.2   | 311.0 | 1.  | 0.8  | 229.7 | 0.  |
| 487 | 2.4   | 311.0 | 1.  | 0.7  | 229.7 | 0.  |



Supplementary Table 7. Closest contacts between aromatic residues that have at least one interatomic contact less than 4 Å.

| Residue 1 |     | Residue 2 |     | closest nonbonded atoms |       | closest sidechain atoms |       |      |     |
|-----------|-----|-----------|-----|-------------------------|-------|-------------------------|-------|------|-----|
|           |     |           |     | Res 1                   | Res 2 | Res 1                   | Res 2 |      |     |
| TYR       | 2   | PHE       | 229 | O                       | 3.33  | CE2                     | CB    | 5.65 | CE2 |
|           |     | PHE       | 248 | OH                      | 2.77  | O                       | OH    | 5.51 | CB  |
| PHE       | 17  | TRP       | 19  | C                       | 3.16  | N                       | CB    | 5.56 | CD1 |
|           |     | TRP       | 58  | CZ                      | 3.87  | CB                      | CZ    | 3.87 | CB  |
|           |     | TYR       | 342 | CE2                     | 3.53  | CE1                     | CE2   | 3.53 | CE1 |
|           |     | TRP       | 382 | O                       | 3.67  | CZ3                     | CB    | 6.35 | CZ3 |
| TRP       | 19  | PHE       | 17  | N                       | 3.16  | C                       | CD1   | 5.56 | CB  |
|           |     | TRP       | 21  | O                       | 3.79  | CZ3                     | CB    | 6.15 | CE3 |
|           |     | TRP       | 382 | NE1                     | 3.54  | CE3                     | NE1   | 3.54 | CE3 |
| TRP       | 21  | TRP       | 19  | CZ3                     | 3.79  | O                       | CE3   | 6.15 | CB  |
|           |     | PHE       | 79  | CD1                     | 3.62  | N                       | CE2   | 3.70 | CD1 |
| TYR       | 31  | PHE       | 37  | CE2                     | 3.76  | CE2                     | CE2   | 3.76 | CE2 |
| PHE       | 37  | TYR       | 31  | CE2                     | 3.76  | CE2                     | CE2   | 3.76 | CE2 |
| TRP       | 58  | PHE       | 17  | CB                      | 3.87  | CZ                      | CB    | 3.87 | CZ  |
|           |     | TRP       | 59  | N                       | 2.73  | N                       | CE2   | 3.76 | CD1 |
|           |     | TYR       | 342 | CB                      | 3.58  | OH                      | CB    | 3.58 | OH  |
|           |     | TRP       | 357 | N                       | 3.24  | O                       | NE1   | 5.34 | CB  |
| TRP       | 59  | TRP       | 58  | N                       | 2.73  | N                       | CD1   | 3.76 | CE2 |
|           |     | TYR       | 62  | O                       | 3.13  | N                       | CB    | 4.93 | CD1 |
|           |     | TRP       | 357 | NE1                     | 3.70  | CB                      | NE1   | 3.70 | CB  |
| TYR       | 62  | TRP       | 59  | N                       | 3.13  | O                       | CD1   | 4.93 | CB  |
| TYR       | 67  | TYR       | 131 | OH                      | 3.01  | OH                      | OH    | 3.01 | OH  |
|           |     | TYR       | 182 | CB                      | 3.66  | CD1                     | CB    | 3.66 | CD1 |
| PHE       | 79  | TRP       | 21  | N                       | 3.62  | CD1                     | CD1   | 3.70 | CE2 |
| TYR       | 94  | PHE       | 229 | CE2                     | 3.68  | CD1                     | CE2   | 3.68 | CD1 |
| TYR       | 118 |           |     |                         |       |                         |       |      |     |
| PHE       | 126 | TYR       | 131 | O                       | 2.97  | N                       | CB    | 4.16 | CB  |
|           |     | PHE       | 136 | CE1                     | 3.72  | CZ                      | CE1   | 3.72 | CZ  |
| TYR       | 131 | TYR       | 67  | OH                      | 3.01  | OH                      | OH    | 3.01 | OH  |
|           |     | PHE       | 126 | N                       | 2.97  | O                       | CB    | 4.16 | CB  |
| TRP       | 134 | PHE       | 136 | C                       | 3.32  | N                       |       |      |     |
|           |     | TRP       | 134 | C                       | 0.05  | C                       | CB    | 0.55 | CB  |
| PHE       | 136 | PHE       | 126 | CZ                      | 3.72  | CE1                     | CZ    | 3.72 | CE1 |
|           |     | TRP       | 134 | N                       | 3.32  | C                       |       |      |     |
|           |     | TRP       | 134 | N                       | 3.36  | C                       |       |      |     |
| TYR       | 151 |           |     |                         |       |                         |       |      |     |
| TYR       | 155 | TRP       | 203 | CD2                     | 3.69  | CZ2                     | CD2   | 3.69 | CZ2 |
| TYR       | 174 |           |     |                         |       |                         |       |      |     |
| TYR       | 182 | TYR       | 67  | CD1                     | 3.66  | CB                      | CD1   | 3.66 | CB  |
| PHE       | 194 | PHE       | 229 | N                       | 2.84  | O                       |       |      |     |
|           |     | PHE       | 231 | O                       | 3.07  | N                       | CB    | 6.41 | CE1 |
| TRP       | 203 | TYR       | 155 | CZ2                     | 3.69  | CD2                     | CZ2   | 3.69 | CD2 |
| TRP       | 221 | PHE       | 222 | O                       | 2.74  | CA                      | CB    | 3.93 | CD1 |
| PHE       | 222 | TRP       | 221 | CA                      | 2.74  | O                       | CD1   | 3.93 | CB  |
| PHE       | 229 | TYR       | 2   | CE2                     | 3.33  | O                       | CE2   | 5.65 | CB  |
|           |     | TYR       | 94  | CD1                     | 3.68  | CE2                     | CD1   | 3.68 | CE2 |
|           |     | PHE       | 194 | O                       | 2.84  | N                       |       |      |     |
|           |     | PHE       | 231 | CE1                     | 3.47  | CD1                     | CE1   | 3.47 | CD1 |
| PHE       | 231 | PHE       | 194 | N                       | 3.07  | O                       | CE1   | 6.41 | CB  |
|           |     | PHE       | 229 | CD1                     | 3.47  | CE1                     | CD1   | 3.47 | CE1 |
| TYR       | 247 | PHE       | 248 | O                       | 2.75  | CA                      | CB    | 5.42 | CD1 |
| PHE       | 248 | TYR       | 2   | O                       | 2.77  | OH                      | CB    | 5.51 | OH  |
|           |     | TYR       | 247 | CA                      | 2.75  | O                       | CD1   | 5.42 | CB  |
| PHE       | 256 | TYR       | 258 | C                       | 3.08  | N                       | CB    | 6.92 | CB  |
|           |     | PHE       | 295 | CE1                     | 3.63  | CZ                      | CE1   | 3.63 | CZ  |
| TYR       | 258 | PHE       | 256 | N                       | 3.08  | C                       | CB    | 6.92 | CB  |
|           |     | TRP       | 280 | CE2                     | 3.16  | NE1                     | CE2   | 3.16 | NE1 |
|           |     | PHE       | 286 | CD2                     | 3.88  | CE1                     | CD2   | 3.88 | CE1 |
|           |     | PHE       | 295 | CD1                     | 3.79  | O                       | CD1   | 6.45 | CB  |

|     |     |     |     |     |      |     |     |      |     |
|-----|-----|-----|-----|-----|------|-----|-----|------|-----|
|     |     | TYR | 333 | CE2 | 3.73 | CD1 | CE2 | 3.73 | CD1 |
| TRP | 269 |     |     |     |      |     |     |      |     |
| TYR | 276 | TRP | 284 | O   | 3.23 | NE1 | CB  | 3.79 | CZ2 |
| TRP | 280 | TYR | 258 | NE1 | 3.16 | CE2 | NE1 | 3.16 | CE2 |
|     |     | TRP | 284 | CA  | 3.62 | CD1 | CE3 | 3.75 | CD2 |
|     |     | PHE | 286 | CH2 | 3.66 | CE1 | CH2 | 3.66 | CE1 |
|     |     | PHE | 327 | CD1 | 3.55 | CE1 | CD1 | 3.55 | CE1 |
| TRP | 284 | TYR | 276 | NE1 | 3.23 | O   | CZ2 | 3.79 | CB  |
|     |     | TRP | 280 | CD1 | 3.62 | CA  | CD2 | 3.75 | CE3 |
|     |     | PHE | 286 | C   | 3.43 | N   | CB  | 3.89 | CE2 |
| PHE | 286 | TYR | 258 | CE1 | 3.88 | CD2 | CE1 | 3.88 | CD2 |
|     |     | TRP | 280 | CE1 | 3.66 | CH2 | CE1 | 3.66 | CH2 |
|     |     | TRP | 284 | N   | 3.43 | C   | CE2 | 3.89 | CB  |
|     |     | TYR | 333 | CB  | 3.24 | OH  | CB  | 3.24 | OH  |
| PHE | 295 | PHE | 256 | CZ  | 3.63 | CE1 | CZ  | 3.63 | CE1 |
|     |     | TYR | 258 | O   | 3.79 | CD1 | CB  | 6.45 | CD1 |
| PHE | 315 | TRP | 316 | O   | 2.73 | CA  | CZ  | 3.35 | NE1 |
|     |     | TYR | 342 | CZ  | 3.68 | O   | CZ  | 6.81 | CB  |
|     |     | TRP | 344 | CZ  | 3.82 | CZ3 | CZ  | 3.82 | CZ3 |
|     |     | TRP | 388 | CB  | 3.94 | CH2 | CB  | 3.94 | CH2 |
| TRP | 316 | PHE | 315 | CA  | 2.73 | O   | NE1 | 3.35 | CZ  |
|     |     | TRP | 344 | CH2 | 3.36 | O   | NE1 | 3.39 | CH2 |
| TYR | 321 |     |     |     |      |     |     |      |     |
| PHE | 327 | TRP | 280 | CE1 | 3.55 | CD1 | CE1 | 3.55 | CD1 |
|     |     | PHE | 419 | CE2 | 3.60 | CE1 | CE2 | 3.60 | CE1 |
|     |     | PHE | 429 | CA  | 3.66 | CZ  | CB  | 3.83 | CZ  |
| TYR | 333 | TYR | 258 | CD1 | 3.73 | CE2 | CD1 | 3.73 | CE2 |
|     |     | PHE | 286 | OH  | 3.24 | CB  | OH  | 3.24 | CB  |
| PHE | 335 |     |     |     |      |     |     |      |     |
| TYR | 342 | PHE | 17  | CE1 | 3.53 | CE2 | CE1 | 3.53 | CE2 |
|     |     | TRP | 58  | OH  | 3.58 | CB  | OH  | 3.58 | CB  |
|     |     | PHE | 315 | O   | 3.68 | CZ  | CB  | 6.81 | CZ  |
|     |     | TRP | 344 | O   | 3.26 | CE3 | CE2 | 4.56 | CB  |
|     |     | TRP | 382 | CB  | 3.87 | CE3 | CB  | 3.87 | CE3 |
| TRP | 344 | PHE | 315 | CZ3 | 3.82 | CZ  | CZ3 | 3.82 | CZ  |
|     |     | TRP | 316 | O   | 3.36 | CH2 | CH2 | 3.39 | NE1 |
|     |     | TYR | 342 | CE3 | 3.26 | O   | CB  | 4.56 | CE2 |
| PHE | 348 |     |     |     |      |     |     |      |     |
| TRP | 357 | TRP | 58  | O   | 3.24 | N   | CB  | 5.34 | NE1 |
|     |     | TRP | 59  | CB  | 3.70 | NE1 | CB  | 3.70 | NE1 |
| TRP | 382 | PHE | 17  | CZ3 | 3.67 | O   | CZ3 | 6.35 | CB  |
|     |     | TRP | 19  | CE3 | 3.54 | NE1 | CE3 | 3.54 | NE1 |
|     |     | TYR | 342 | CE3 | 3.87 | CB  | CE3 | 3.87 | CB  |
| TRP | 388 | PHE | 315 | CH2 | 3.94 | CB  | CH2 | 3.94 | CB  |
| TRP | 396 | PHE | 397 | O   | 2.79 | CA  | CB  | 5.46 | CB  |
|     |     | TRP | 396 | N   | 0.02 | N   | CB  | 0.27 | CB  |
| PHE | 397 | TRP | 396 | CA  | 2.79 | O   | CB  | 5.46 | CB  |
|     |     | PHE | 426 | CZ  | 3.79 | N   | CZ  | 5.96 | CB  |
|     |     | TRP | 396 | N   | 2.82 | N   | CB  | 5.39 | CB  |
| PHE | 406 | TRP | 409 | CZ  | 3.54 | CE3 | CZ  | 3.54 | CE3 |
|     |     | PHE | 419 | CE1 | 3.54 | CG  | CE1 | 3.54 | CG  |
| TRP | 409 | PHE | 406 | CE3 | 3.54 | CZ  | CE3 | 3.54 | CZ  |
|     |     | TRP | 410 | O   | 2.80 | CA  | CD1 | 5.38 | CB  |
|     |     | PHE | 419 | CZ3 | 3.84 | CD1 | CZ3 | 3.84 | CD1 |
| TRP | 410 | TRP | 409 | CA  | 2.80 | O   | CB  | 5.38 | CD1 |
| PHE | 419 | PHE | 327 | CE1 | 3.60 | CE2 | CE1 | 3.60 | CE2 |
|     |     | PHE | 406 | CG  | 3.54 | CE1 | CG  | 3.54 | CE1 |
|     |     | TRP | 409 | CD1 | 3.84 | CZ3 | CD1 | 3.84 | CZ3 |
|     |     | PHE | 426 | O   | 3.30 | CD1 | CB  | 5.52 | CE1 |
| PHE | 426 | PHE | 397 | N   | 3.79 | CZ  | CB  | 5.96 | CZ  |
|     |     | PHE | 419 | CD1 | 3.30 | O   | CE1 | 5.52 | CB  |
|     |     | PHE | 477 | CE2 | 3.73 | CE1 | CE2 | 3.73 | CE1 |
| PHE | 429 | PHE | 327 | CZ  | 3.66 | CA  | CZ  | 3.83 | CB  |

|     |     |     |     |     |      |     |     |      |     |
|-----|-----|-----|-----|-----|------|-----|-----|------|-----|
| TRP | 434 | PHE | 487 | CD2 | 3.52 | CB  | CD2 | 3.52 | CB  |
| TYR | 449 |     |     |     |      |     |     |      |     |
| TYR | 468 |     |     |     |      |     |     |      |     |
| PHE | 477 | PHE | 426 | CE1 | 3.73 | CE2 | CE1 | 3.73 | CE2 |
| PHE | 487 | PHE | 429 | CB  | 3.52 | CD2 | CB  | 3.52 | CD2 |
| TRP | 134 | TRP | 134 | C   | 0.05 | C   | CB  | 0.55 | CB  |
|     |     | PHE | 136 | C   | 3.36 | N   |     |      |     |
| TRP | 396 | TRP | 396 | N   | 0.02 | N   | CB  | 0.27 | CB  |
|     |     | PHE | 397 | N   | 2.82 | N   | CB  | 5.39 | CB  |

Supplementary Figure 1. Stereoviews of the sites along the active site cleft with interactions between the limit dextrin and  $\alpha$ -amylase identified. Superimposed as slender sticks is the acarbose-derived inhibitor from 1HX0 (27). The overlaid map is a difference density map contoured at  $2.0 \sigma$ . Residues from PPA are green; the limit dextrin is yellow; and, the inhibitor is pale cyan. (a) and (b) are two views that concentrate on the glucose interactions of sites -1 and -2. (c) and (d) are two views that focus on sites -2 and -3. (e) and (f) are two views that focus on sites -4, -4b and -5.

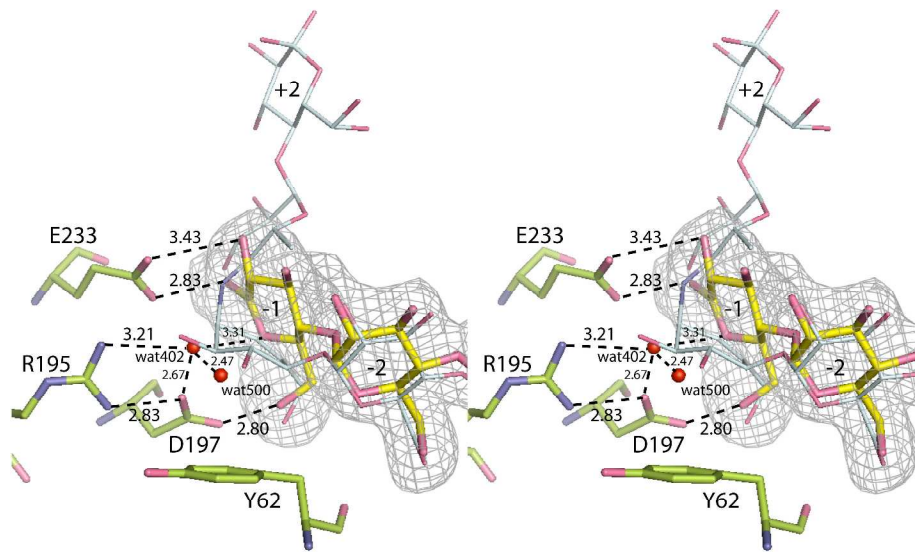

(a)

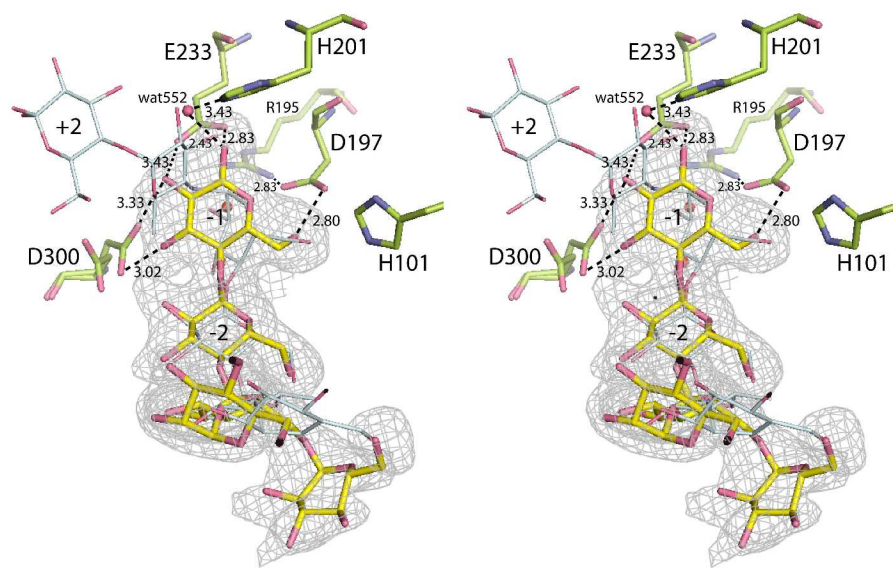

(b)

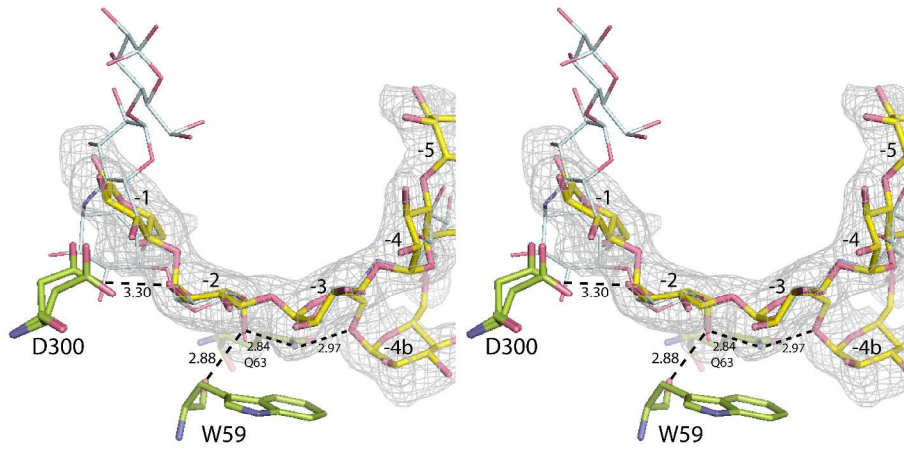

(c)

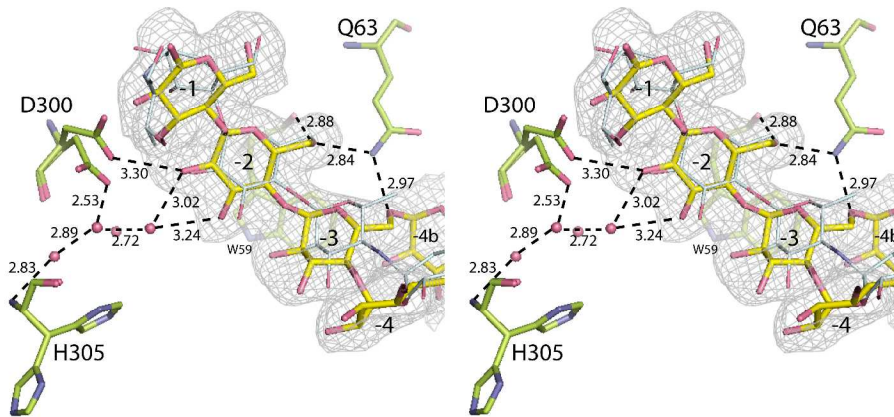

(d)

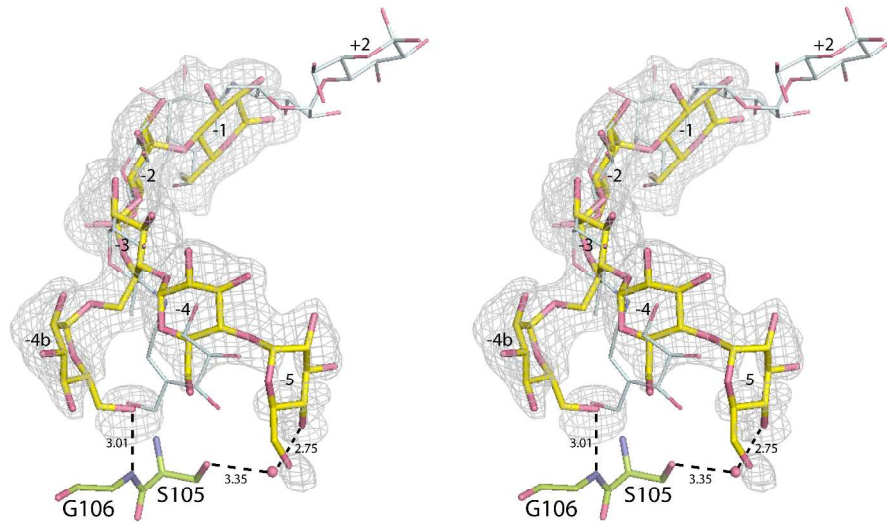

(e)

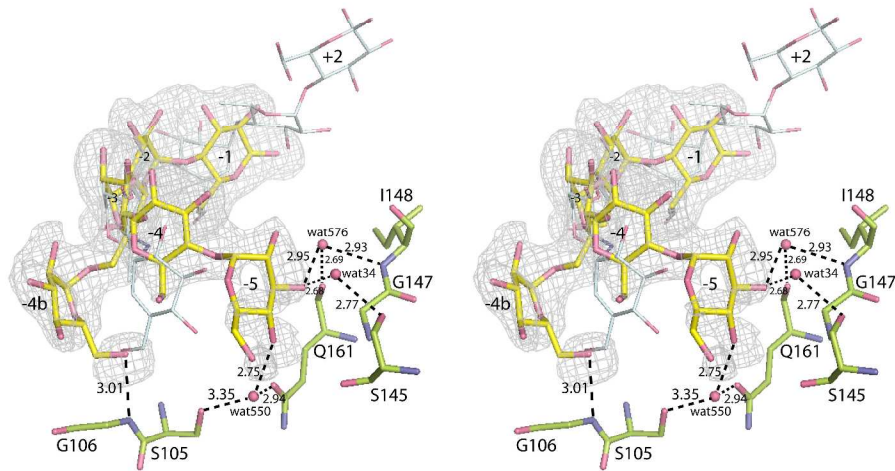

(f)

Supplementary Figure 1
